# Supplementary material for: Multiple ciliary localization signals control INPP5E ciliary targeting
Source: PubMed Central journal article supplement (PMC9444247; doi:10.7554/elife.78383), 2022-09-05
Supplement: elife-78383-fig2-figsupp4-data1.pdf [file elife-78383-fig2-figsupp4-data1.pdf]

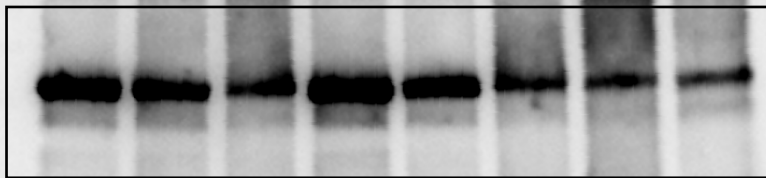

**WB: EGFP**
