# Supplementary material for: Multiple ciliary localization signals control INPP5E ciliary targeting
Source: eLife journal article supplement (doi:10.7554/elife.78383), 2022-08-22

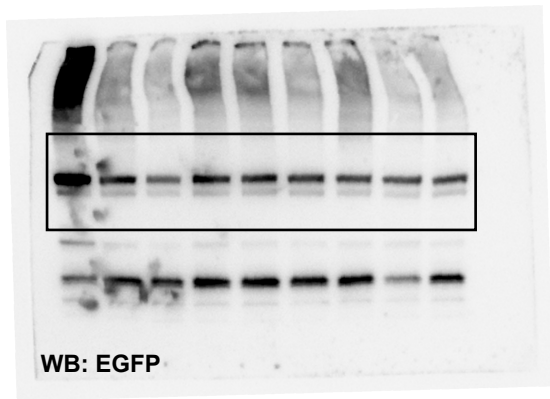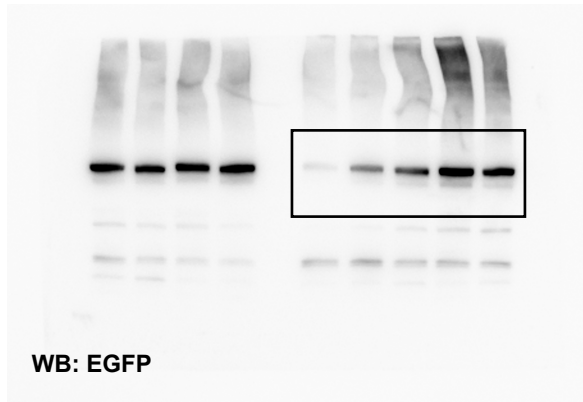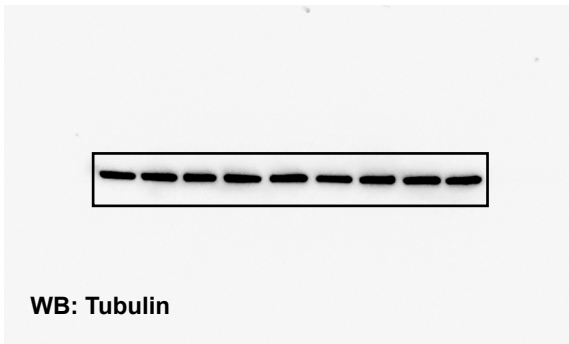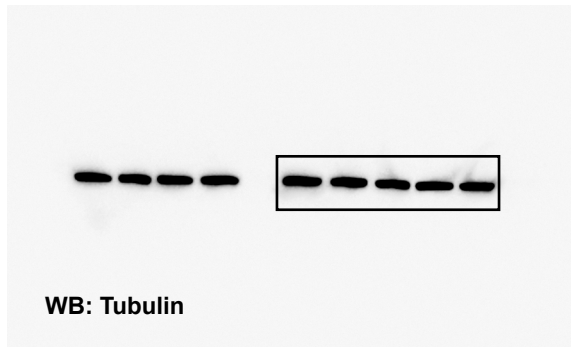

Supplement: fig5-data1 [file elife-78383-fig5-data1-v1.pdf]
