# Supplementary material for: Multiple ciliary localization signals control INPP5E ciliary targeting
Source: eLife. 2022 Sep 5;11:e78383. doi: 10.7554/eLife.78383 (PMC9444247; doi:10.7554/eLife.78383)
Supplement: Figure 2—source data 1. — Data from n=3 independent experiments. [file elife-78383-fig2-data1.xlsx]

## Sheet: Hoja1
	WT	D477N	W348A	Y360A	W383A	LYL>AAA	FDR>AAA	RR>AA	R378A	R379A
Experiment 1	100	100	4.5	0	7.9	0	3.7	0	99.2	100
Experiment 2	100	100	0	0.9	0	0	0	3.2	100	94.4
Experiment 3	100	100	2.8	2.1	0	1.6	1.1	1.7	99.2	97.1
