# Supplementary material for: Multiple ciliary localization signals control INPP5E ciliary targeting
Source: eLife. 2022 Sep 5;11:e78383. doi: 10.7554/eLife.78383 (PMC9444247; doi:10.7554/eLife.78383)
Supplement: Figure 2—source data 2. — Data from n=9 independent experiments. [file elife-78383-fig2-data2.xlsx]

## Sheet: Hoja1
	No enzyme	WT	D477N	W348A	Y360A	W383A	FDR>AAA	LYL>AAA	R378A	R379A	RR>AA
Experiment-1	3.33	40.56	3.41	2.56		22.47					6.33
Experiment-2	3.55	70.91	6.38	4.36		37.05			57.91	34.81	17.33
Experiment-3	4.15	38.51	5.31	4.45	4.97	20.67	9.32				10.65
Experiment-4	7.1	59.56	6.97		6.71	24.1	15.87	27.25		27.78
Experiment-5	7.47	75.71			6.94		21.32	30.63		36.27
Experiment-6	8.79	72.4						23.66
Experiment-7	5.8	55.11							48.31
Experiment-8	7.63	57.77							48.86
Experiment-9	11.52	75.95	15.29			62.69
