# Supplementary material for: Multiple ciliary localization signals control INPP5E ciliary targeting
Source: eLife. 2022 Sep 5;11:e78383. doi: 10.7554/eLife.78383 (PMC9444247; doi:10.7554/eLife.78383)
Supplement: Figure 2—source data 3. — Data from n=8 independent experiments. [file elife-78383-fig2-data3.xlsx]

## Sheet: Hoja1
	WT	D477N	W348A	Y360A	W383A	LYL>AAA	FDR>AAA	RR>AA	R379A	R378A
Experiment 1	100	95.97	55.23		83.87			37.64
Experiment 2	100	123.95	89.96		115.08			110.68		141.04
Experiment 3	100	97.85	81.75	71.96	87.61		84.24	89.92
Experiment 4	100	90.42		55.36	71.79	75.9	67.78		83.4
Experiment 5	100			38.88		55.76	70.95		49.04
Experiment 6*
Experiment 7	100									77.61
Experiment 8	100									81.98
Experiment 9	100	86.41			62.96
	* Western blot for experiment-6 not available
