# Supplementary material for: Multiple ciliary localization signals control INPP5E ciliary targeting
Source: eLife. 2022 Sep 5;11:e78383. doi: 10.7554/eLife.78383 (PMC9444247; doi:10.7554/eLife.78383)
Supplement: Figure 3—source data 1. — Data from n=3 independent experiments. [file elife-78383-fig3-data1.xlsx]

## Sheet: Hoja1
	WT	Δ251-273	C641S	Δ251-273 + C641S
Experiment 1	100	32.8	77	5.8
Experiment 2	100	39.5	65.9	1
Experiment 3	99	53.6	76.2	1.3
