# Supplementary material for: Multiple ciliary localization signals control INPP5E ciliary targeting
Source: eLife. 2022 Sep 5;11:e78383. doi: 10.7554/eLife.78383 (PMC9444247; doi:10.7554/eLife.78383)
Supplement: Figure 4—source data 1. — Data from n=5 independent experiments. [file elife-78383-fig4-data1.xlsx]

## Sheet: Hoja1
% TULP3 negative cilia	INPP5E-KO Clone-3					INPP5E-KO Clone-12
	Experiment 1	Experiment 2	Experiment 3	Experiment 4	Experiment 5	Experiment 1	Experiment 2	Experiment 3	Experiment 4	Experiment 5
Not transfected	12	3	9	12		3	3	5
EGFP	6	9	14	5		16	4	7
WT	88	100	81			100	93	96
D477N	4	15	15		15	36	9	10		4
ΔCLS1	58		75	65		69		67	65
ΔCLS2	56		36		33	78		47		52
ΔCLS3	12		5		17	22		17		10
ΔCLS4	94		94	88		100		89	100
ΔCLS1+4	5		11	6		15		6	17
Δ297-599		14	8	6			0	0
