# Supplementary material for: Multiple ciliary localization signals control INPP5E ciliary targeting
Source: eLife. 2022 Sep 5;11:e78383. doi: 10.7554/eLife.78383 (PMC9444247; doi:10.7554/eLife.78383)
Supplement: Figure 6—source data 11. — Data from n=11 experiments. [file elife-78383-fig6-data11.xlsx]

## Sheet: Hoja1
% ARL13B co-IP	Co-IP of endogenous ARL13B			Co-IP of exogenous ARL13B-Flag
	Experiment 1	Experiment 2	Experiment 3	Experiment 1	Experiment 2	Experiment 3	Experiment 4	Experiment 5	Experiment 6	Experiment 7	Experiment 8
EGFP	0.23	0.32	0.19	0.2	0.81	5.13	1.19	0	1.43	8.44	5.49
WT	100	100	100	100	100	100	100	100	100	100	100
ΔCLS1	34.2	102.28	103.01							90.95	91.83
ΔCLS2	56.83	186.66	103.14	20.38	47.29	106.88	121.57	124.8	107.71	93.39	135.65
ΔCLS3	172.49	222.9	134.83	18	103.59	88.21	137.56	109.09	119.82	150.04	131.09
ΔCLS4	33.95	59.97	49.21							48.07	55.86
ΔCLS1+4	24.12	57.38	75.82							39.19
