# Supplementary material for: Multiple ciliary localization signals control INPP5E ciliary targeting
Source: eLife. 2022 Sep 5;11:e78383. doi: 10.7554/eLife.78383 (PMC9444247; doi:10.7554/eLife.78383)
Supplement: Figure 7—source data 14. — Data from n=7 experiments. [file elife-78383-fig7-data14.xlsx]

## Sheet: Hoja1
% TULP3-myc co-IP
	EGFP	WT	ΔCLS1	ΔCLS2	ΔCLS3	ΔCLS4	ΔCLS1+4
Experiment 1	0.52	100	94.14	34.34	22.5	130.49	76.82
Experiment 2	1.12	100	97.02	43.72	44.05	111.13	98.19
Experiment 3	2.89	100	80.94	32.52	22.42	51.73	59.99
Experiment 4	7.31	100		79.1	57.99
Experiment 5	7.65	100		22.42	31.91
Experiment 6	41.02	100		97.87	0
Experiment 7	7.73	100	121.04	53.06	40.97	66.84	67.89
