# Supplementary material for: Multiple ciliary localization signals control INPP5E ciliary targeting
Source: eLife. 2022 Sep 5;11:e78383. doi: 10.7554/eLife.78383 (PMC9444247; doi:10.7554/eLife.78383)
Supplement: Figure 7—source data 15. — Data from n=5 experiments. [file elife-78383-fig7-data15.xlsx]

## Sheet: Hoja1
% CEP164 co-IP
	EGFP	WT	ΔCLS1	ΔCLS2	ΔCLS3	ΔCLS4	ΔCLS1+4
Experiment 1	1	100	85.67	189.78	455.85	59.86	89.69
Experiment 2	5.56	100		361.98	752.67
Experiment 3	2.47	100		296.23	331.02
Experiment 4	3.14	100	136.65	900.04	452.17	804.59	109.47
Experiment 5	0	100	85.46	811.47	286.16	360.1	71.69
