# Supplementary material for: Multiple ciliary localization signals control INPP5E ciliary targeting
Source: eLife. 2022 Sep 5;11:e78383. doi: 10.7554/eLife.78383 (PMC9444247; doi:10.7554/eLife.78383)
Supplement: Figure 8—source data 5. — Data from n=3 experiments. [file elife-78383-fig8-data5.xlsx]

## Sheet: Hoja1
Flag-ATG16L1 co-IP
	EGFP	WT	ΔCLS1	ΔCLS4	ΔCLS1+4
Experiment 1	4.15	100	88.74	87.31	47.4
Experiment 2	1.02	100	132.46	155.49	81.91
Experiment 3	0.41	100	86.66	63.53	45.77
